# Supplementary material for: A time- and cost-effective strategy to sequence mammalian Y Chromosomes: an application to the de novo assembly of gorilla Y
Source: HighWire-hosted journal article supplement (doi:10.1101/gr.199448.115), 2016-03-02
Supplement: Supplemental_Tables.xlsx [file Supplemental_Tables.xlsx]

## Sheet: S1
Table S1. The size distribution of gorilla WGA flow-sorted Y chromosome material before and after debranching -- BioAnalyzer results (see Methods for details).
	WGA		WGA after debranching
DNA size range (bp)	Average size (bp)	% from the total	Average size (bp)	% from the total
100-1,000	715	5	604	8
1,000-5,000	2941	38	2810	50
5,000-10,000	7206	43	7119	37
10,000-15,000	11959	12	12269	3
15,000-50,000	20913	2	17841	2

## Sheet: S2
Table S2a. Enrichment for the Y chromosome in the flow-sorted material as compared to male genomic DNA. We used bowtie 2 (Langmead et al., 2012) with stringent criteria to align the reads generated from sequencing of the flow-sorted material, as well as the reads generated from sequencing of male genomic DNA, to the repeat-masked human Y chromosome. The enrichment was computed as the ratio of the…
Library type	Gorilla male genomic PE	Gorilla male genomic MP*
% reads from gorilla male genomic library mapped to repeat-masked human Y	0.41	0.54
% reads from gorilla Y flow-sorted library mapped to repeat-masked human Y	12.83	15.49
enrichment	31.29	28.69
*average between libraries GY19 and MPGY
Table S2b. Reference without RepeatMasking
Library type	Gorilla male genomic PE	Gorilla male genomic MP*
% reads from gorilla male genomic library mapped to NON repeat-masked human Y	5.45	12.74
% reads from gorilla Y flow-sorted library mapped to NON repeat-masked human Y	52.88	49.19
enrichment	9.7	3.86
*average between libraries GY19 and MPGY
Table S2c. Reference is autosomes+X chromosome with RepeatMasking
Library type	Gorilla male genomic PE	Gorilla male genomic MP*
% reads from gorilla male genomic library mapped to repeat-masked autosomes + X	35.03	42.53
% reads from gorilla Y flow-sorted library mapped to repeat-masked autosomes + X	22.97	18.58
52.9% of autosomes + X is masked in Ns
*average between libraries GY19 and MPGY

## Sheet: S3
Table S3. Assembly comparisons.
Assembly/Parameter	ALLPATHS	SPADES	SSPACE	SSPACE-LR	PBJelly (best)	HGAP	MHAP
NG50 (G=25 Mb)*	20,827 bp	1,952 bp	19,953 bp	52,752 bp	99,194 bp	-	-
Longest contig or scaffold	99,987 bp	80,805 bp	200,588 bp	418,892 bp	485,854 bp	120,784 bp	118,468 bp
The number of Ns per 100 kb	67898	130	20313	24413	9404	0	0
Repeat % (excluding Ns)	0.5701	0.5972	0.5966	0.6068	0.5808	0.5696	0.4686
Assembly Length, Mb	26.8 Mb	13.3 Mb	17.9 Mb	20.3 Mb	25.4 Mb	10.7 Mb	11.3 Mb
No. of Scaffolds	2211	2020	1143	696	698	948	902
N50, bp	19589	12111	35919	77181	97455	15568	14607
*NG50 is N50 that takes the expected assembly length into account. We assumed that the size of the euchromatic portion of gorilla Y chromosome is similar to that for human Y, i.e. ~25 Mb, (Skaletsky et al. 2003)
Assembly/X-degenerate gene retrieval (numbers used to construct Figure 2B)	ALLPATHS	SPADES	SSPACE	SSPACE-LR	PBJelly (best)	HGAP	MHAP
AMELY	0	0.59	0.92	0.92	0.92	0.79	0.81
CYorf15A	0.72	1	1	1	1	0.65	0.48
TXLNGY	0.28	1	1	1	1	0.38	0.12
DDX3Y	0.2	0.93	1	1	1	0.82	0.46
ElF1AY	0.64	1	1	1	1	0.09	0.09
KDM5D	0.65	0.86	0.96	0.97	0.97	0.76	0.62
NLGN4Y	0.59	1	1	1	1	0.68	1
PRKY	0.46	0.68	0.68	0.68	0.88	0.16	0.63
RPS4Y1	0.86	0.99	0.99	0.99	0.99	0.75	0.61
RPS4Y2	0.95	1	1	1	1	0.53	0.8
SRY	1	1	1	1	1	1	1
TBL1Y	0.93	0.99	0.99	0.99	0.99	0.82	0.99
TMSB4Y	0.63	0.97	0.97	0.97	0.97	0.97	0
USP9Y	0.5	0.89	0.89	0.96	0.97	0.35	0.2
UTY	0.39	0.93	0.93	0.79	0.84	0.48	0.25
ZFY	0.75	1	1	1	1	0.52	0.8
Assembly/ampliconic gene retrieval (numbers used to construct Figure 2 B)	ALLPATHS	SPADES	SSPACE	SSPACE-LR	PBJelly (best)	HGAP	MHAP
BPY2	1	1	1	1	1	1	0
CDY	0.72	0.99	0.99	0.92	1	1	1
DAZ	0.71	1	1	1	1	0.33	0
HSFY1	0.94	1	1	1	1	1	1
PRY	0.91	1	1	1	1	0.94	0.97
RBMY	0.84	0.97	0.94	0.93	0.95	0.97	0.97
TSPY	0.95	0.94	0.94	0.94	0.94	0.97	0.97
VCY	0	0	0	0	0	0	0
XKRY	0.99	0.99	0.99	0.99	0.99	0.99	0.98

## Sheet: S4
Table S4. Effect of RecoverY on the SPAdes assembly. Assembly improvements due to the use of RecoverY and running SPAdes as compared to just running SPAdes on an equivalent amount of non-RecoverY data (25 million randomly sampled paired end reads). (A) Comparison of large contigs fraction. (B) Comparison of number of contaminant and Y-specific contigs. (C) Comparison of length of contaminant and …
Table S4A. Comparison of large contigs fraction
Statistics	no RecoverY	with RecoverY
#contigs	364183	7686
# Large contigs (contig size > 1000 bp)	15757	2584
% Large contigs among all contigs	4	33.6
Table S4B. Comparison of the number of Y-specific contigs
Statistics	no RecoverY	with RecoverY
# contigs with top hit to female gorilla (including non-PAR region of X)	351863	3837
# contigs with top hit to Y (human or chimp) and PAR region of X	12320	3849
% of total number of contigs to be discarded as contamination (from autosome or X)	97	49.9
Table S4C. Comparison of the length of Y-specific contigs
Statistics	no RecoverY	with RecoverY
Total length of assembly (bp)	154825357	17645183
length of assembly with top hit to Y (bp)	19422367	14191214
% of assembly length with top hit Y	12.5	80.4
Table S4D. N50 comparison
Statistics	no RecoverY	with RecoverY
N50 of total assembly	3108	11408

## Sheet: S5
Table S5. PacBio only HGAP assembly comparisons. HGAP (Chin et al. 2013) runs with different seed length thresholds are shown. All reads above the length threshold were subject to error-correction ("long reads" in the table). Out of these, 30-45% were successfully error-corrected ("corrected" in the table). Finally, the size of the resulting assembly is listed.
Assembly name	18 kb (automatic)	15 kb	11 kb	5 kb
Length threshold (bp)	18307	15000	11000	5000
Filtered subreads (Mb)	13898	13898	13898	13898
Filtered subreads N50 (bp)	6723	6723	6723	6723
Long reads (Mb)	150	534	1480	1480
Long reads N50 (bp)	19838	16867	14066	14069
Long reads coverage estimate	1.5	5.34	14.8	14.8
Corrected contigs (Mb)	64	240	878	2631
Corrected contigs N50 (bp)	8327	7927	7450	5534
Corrected contigs coverage estimate	0.64	2.4	8.78	26.31
Polished (post-Quiver) assembly (Mb)	15	40	137	233
Polished (post-Quiver) assembly N50 (bp)	13358	16234	12554	13815

## Sheet: S6
Table S6. Report from REAPR after mapping of a mate pair library (GY19) to the SSPACE scaffolds.
Table S6A. Comparison of statistics before and after breaking suggested by REAPR due to mate pair mapping
	SSPACE_scaffolds	SSPACE_scaff_broken
Total Assembly Length	22653757	23516815
Number of Contigs	5667	6191
N50	28498	21550
Longest Contig	200588	200588
Table S6B. REAPR report with Fragment Coverage Distribution (FCD) errors, which could indicate incorrect scaffolding, a large insertion or deletion in the assembly, or sometimes a false join in a contig
FCD errors within a contig	391
FCD errors over a gap	79
Low fragment coverage within a contig	384
Low fragment coverage over a gap	27
Total errors	881

## Sheet: S7
Table S7. Scaffolds mapping to gorilla PAR. This table contains scaffolds with BLASR top hit mapping to PAR regions (as annotated on human Y, chimpanzee Y, or gorilla X).
To identify the PAR associated scaffolds in our assembly, we first used the LASTZ aligner (Harris 2007) to find the gorilla PAR as the region in the RepeatMasked reference female gorilla X that was homologous to the PAR1 region in human. Using BLASR and minimum identity of 70%, we shortlisted the scaffolds mapping with best match to either human Y PARs, chimpanzee Y PAR and gorilla X PAR as putat…
Contig7/0_232256
Contig120/0_122059
Contig141/0_74459
Contig163/0_30088
Contig168/0_25595
Contig200/0_37204
Contig220/0_73050
Contig218/0_21166
Contig229/0_62882
Contig271/0_25145
Contig262/0_64992
Contig321/0_4315
Contig305/0_47223
Contig324/0_28567
Contig347/0_30827
Contig356/0_30125
Contig361/0_24566
Contig414/0_16417
Contig419/0_9627
Contig423/0_4219
Contig428/0_10623
Contig461/0_9164
Contig481/0_3525
Contig468/0_29274
Contig466/0_43631
Contig489/0_25721
Contig548/0_4814
Contig569/0_11253
Contig580/0_11587
Contig602/0_6046
Contig577/0_3893
Contig660/0_1396
Contig679/0_27528
Contig712/0_13051
Contig709/0_4083
Contig731/0_6336
Contig743/0_1186
Contig759/0_4738
Contig753/0_6198
Contig790/0_3938
Contig797/0_6482
Contig802/0_7482
Contig787/0_16736
Contig808/0_8987
Contig840/0_1259
Contig866/0_4174
Contig859/0_5258
Contig876/0_10422
Contig947/0_1216
Contig945/0_1424
Contig951/0_2537
Contig968/0_1093
Contig969/0_1459
Contig976/0_3521
Contig978/0_2283

## Sheet: S8 
Table S8. Experimental validations and primers used for validation of gorilla-Y specific contigs mapped to human/chimp Ys and gorilla-Y-specific breakpoints in the best assembly.
Table S8A. Summary of the experimental validation results using both approaches
		Number of validations in male gDNA	Number of validations in WGA gorilla-Y DNA	Number of non-specific or no PCR products
	Gorilla-Y contigs mapped to the human and chimp Ys	25 out of 32 (78%)	1 out of 32 (3%)	6 out of 32 (19%)
	Gorilla-Y-specific breakpoints	32 out of 42 (76%)	4 out of 42 (10%)	6 out of 42 (14%)
Table S8B. Experimental validations and primers used for validation of gorilla-Y specific contigs mapped to human/chimp Ys.
Number	Primer name	Coordinates in the best assembly	Primer sequence	Expected PCR product size (bp)	Primers in female	Observed PCR product size	Observed PCR product size
				retrieved from the best assembly		genomic DNA (bp)	WGA Y DNA (bp)
1	Contig0_F	Contig0: 77444-78665	TTTGGGCACCCATATTGATT
	Contig0_R		CCCATCTGTGTGGCAGTATG	1222	absent	1222	PCR not performed
2	Contig3_F	Contig3: 143165-144405	CAGGTGAATGTGTGGGTCAG
	Contig3_R		TCGCTGCAGAACAATGAAAC	1241	absent	1241	PCR not performed
3	Contig9_F	Contig9: 292486-293682	GAGCTGGAAGTAGGCACAGG
	Contig9_R		GCTCTGCTGGGAAAGAATTG	1197	absent	1197	PCR not performed
4	Contig99_F	Contig99: 23188-24981	TAGCTAGCTCAGCCCTCTCG
	Contig99_R		CATAGCACGACAGCCAGAAA	1038	absent	~1500	~1500
5	Contig100_F	Contig100: 52834-53871	AACGAGGAAGGCTCAGAACA
	Contig100_R		AGGGACCCTGTTGTTCACTG	1516	absent	~1000	~1000
6	Contig102_F	Contig102: 27572-29087	ATTGACGGCAGTGCATTACA
	Contig102_R		CAATGCACGAGGAAGTCTCA	1546	absent	1546	PCR not performed
7	Contig13_F	Contig13: 31383-32652	ACTTTCCGAGTGCCTCTTGA
	Contig13_R		TTGATCGTCCTCCAGGAATC	1270	absent	1270	PCR not performed
8	Contig17_F	Contig17: 79312-80599	ACCTACCTGGCCTGCCTAAT
	Contig17_R		CTTGGGTTCACAGAGGGTGT	1288	absent	1288	PCR not performed
9	Contig25_F	Contig25: 63143-65114	CAGAGAGGAGGCCACGTAAG
	Contig25_R		TCTGTCTGTTCCCGCTCTTT	1972	absent	1972	PCR not performed
10	Contig26_F	Contig26: 73801-75396	TGTTGCTGCTGAATGACTCC
	Contig26_R		TTCTCACATGCAAAGCGAAC	1596	absent	no product	no product
11	Contig31_F	Contig31: 128191-129258	TGGAGAACGTCTGCATTGAG
	Contig31_R		CTTTCCAGTCCACCACCTGT	1068	absent	1068	PCR not performed
12	Contig41_F	Contig41: 60791-62334	ACCTCCAAGCTGCTCCTACA
	Contig41_R		CAGATCCACAGCTGGTCTGA	1544	absent	1544	PCR not performed
13	Contig42_F	Contig42: 17060-18478	GGCGTTCAAAGCAAAGAGAC
	Contig42_R		AAGCGCACTCGCCTTTATTA	1419	absent	no product	~750 bp
14	Contig45_F	Contig45: 11130-12443	AGAGGTGGGCCTTTGGTAGT
	Contig45_R		TTTCGTGTCGTGTGGGTTTA	1314	absent	no product	no product
15	Contig48_F	Contig48: 29505-31466	GTGACAGAGCTGCATTTCCA
	Contig48_R		CATGGGTGTGTGACAGGAAG	1962	absent	1962	PCR not performed
16	Contig56_F	Contig56: 96165-97256	GCCTCAACTGTTCCTTCAGC
	Contig56_R		ACGGTGCCAGACATACATGA	1092	absent	1092	PCR not performed
17	Contig58_F	Contig58: 2498-4026	CCACTGCTTGCTTGACGATA
	Contig58_R		CACCATGCAGGCATTACAAC	1529	absent	1529	PCR not performed
18	Contig61_F	Contig61: 88247-89633	GGCTTAGTTTGTGGGTGCAT
	Contig61_R		GTTCCAAAGCCTCTGCTCAC	1387	absent	1387	PCR not performed
19	Contig63_F	Contig63: 172736-174570	GAGGGCAGAAAGCAACACTC
	Contig63_R		CATTGCCCACCAATTAATCC	1835	absent	no product	no product
20	Contig65_F	Contig65: 84421-86029	GGGTTCAGACTGGTGCAAAT
	Contig65_R		AACCATGCATGCACATCCTA	1609	absent	no product	no product
21	Contig66_F	Contig66: 50441-52210	CATGCCCAAAGAATTCAGGT
	Contig66_R		CAAGCAGCCTGTTTCACAAA	1770	absent	1770	PCR not performed
22	Contig68_F	Contig68: 54936-56462	GCAGGTTGAGCTGTCTTTCC
	Contig68_R		TCACCAGCTTCTTCATGTGC	1527	absent	1527	PCR not performed
23	Contig69_F	Contig69: 55015-56931	TGGAACCCAACAATACAGCA
	Contig69_R		TTAGCACAATGGCTCAGACG	1917	absent	1917	PCR not performed
24	Contig70_F	Contig70: 10733-12216	CAGCCAACAACAAACCACAC
	Contig70_R		CAGCAGAGGACTGGATGTGA	1484	absent	1484	PCR not performed
25	Contig71_F	Contig71: 43344-45269	GTACCATGCTTCCTCCGTGT
	Contig71_R		AAACTGGACCACTCCCACAG	1926	absent	1926	PCR not performed
26	Contig72_F	Contig72: 54823-56346	ACAGCCGGCATTAGCTCTTA
	Contig72_R		AGCCAGTTCATACCCTGGTG	1524	absent	1524	PCR not performed
27	Contig73_F	Contig73: 31609-32867	TGAATTGGATGCGAATTTGA
	Contig73_R		TTCCCACATTTCTTCCGTTC	1259	absent	no product	no product
28	Contig79_F	Contig79: 43413-45408	GCCAACTCTTGTGCTGGAAT
	Contig79_R		TGGCCCTGGTATCTAACGTC	1996	absent	1996	PCR not performed
29	Contig81_F	Contig81: 4139-5667	CACCATGCAGGCATTACAAC
	Contig81_R		CCACTGCTTGCTTGACGATA	1529	absent	1529	PCR not performed
30	Contig92_F	Contig92: 37990-39729	TGGCAACTTGGTTTGGTGTA
	Contig92_R		GTGCAAGAACCTGGAGAAGC	1740	absent	1740	PCR not performed
31	Contig94_F	Contig94: 43250-45079	TTCCTTGCTTTGAAGCTGGT
	Contig94_R		CCTGGCTCAGAGTTCCTTTG	1830	absent	1830	PCR not performed
32	Contig105_F	Contig105: 58494-59847	AACGCCTTATGCAGAGGAGA
	Contig105_R		GCTCGCAGATGTGAAGTGAA	1354	absent	no product	no product
Table S8C. Experimental validations and primers used for validation of gorilla-Y-specific breakpoints in the best assembly.
Number	Primer name	Coordinates in the best assembly	Primer sequence	Expected PCR product size (bp)	Primers in female	Observed PCR product size	Observed PCR product size
				retrieved from the best assembly		genomic DNA (bp)	WGA Y DNA (bp)
1	GSB_J1L_F	Contig120: 105301-105698	TTGGGCAATTCAATAACTGG
	GSB_J1L_R		TGCACAAGAAAACATGCGTTA	398	absent	398	PCR not performed
2	GSB_J6L_F	Contig128: 37248-37793	ATCTGCAGGCAGCTGAACTC
	GSB_J6L_R		TGATCCATTTGTGACTGTGGA	546	absent	546	PCR not performed
3	GSB_J7L_F	Contig153: 74602-74920	TTTGGCTTTGCCTGTTTCAT
	GSB_J7L_R		CAAACCCACCCAGAAAGAGA	319	absent	319	PCR not performed
4	GSB_J8L_F	Contig153: 91008-91809	TGGATTGGATAGGACGCATA
	GSB_J8L_R		AGCCAGAAAGAAAAGCCACA	802	absent	~450	no product
5	GSB_J9L_F	Contig171: 29286-30277	CAGAGCCAGCTACATCCTGA
	GSB_J9L_R		TCATTGCTCAAAATGCACAG	992	absent	992	PCR not performed
6	GSB_J10L_F	Contig17: 24955-25579	ACAAATTCCAGATGCCCAAG
	GSB_J10L_R		ATTGAGAAAAGGCTGCCTCA	625	absent	625	PCR not performed
7	GSB_J11L_F	Contig208: 26962-27541	TCTATGCACCTGTGTTGAAGC
	GSB_J11L_R		GCTCTTGGATATAATATTGAGGAAGG	580	absent	several bands	several bands
8	GSB_J13L_F	Contig208: 44588-45174	GGCTGGTGGCACATCAAA
	GSB_J13L_R		TGGCACAGGTGTTTGGAAAT	587	absent	several bands	587
9	GSB_J14L_F	Contig22: 131811-132487	TAAGCTGGAATCTGCTGCAC
	GSB_J14L_R		CACCATACCAGCCTCCTTCT	677	absent	677	PCR not performed
10	GSB_J15L_F	Contig22: 74053-74647	CTAGGAGAAGACCGGCAGTG
	GSB_J15L_R		GCTGGGATCAAGGTAGGTCA	595	absent	595	PCR not performed
11	GSB_J17L_F	Contig244: 4741-5333	AGCGTTGACTGAAGTGAGAAG
	GSB_J17L_R		CTCACATCTGTACCTTCCATCC	593	absent	593	PCR not performed
12	GSB_J18L_F	Contig274: 18537-20029	ATGGCAGGAAATGACCTCAG
	GSB_J18L_R		GTCAGCATCCCTGTTTCCAT	1493	absent	1493	PCR not performed
13	GSB_J20L_F	Contig2: 1700-2039	TGCCATGTTGGTGTTTCTGT
	GSB_J20L_R		CAAAACGATGCTGACCTTGA	340	absent	340	PCR not performed
14	GSB_J22L_F	Contig2: 428399-428810	GAAGGTGGGGAAAGATGACA
	GSB_J22L_R		TAGAGAAAAGCCACCCAGGA	412	absent	412	PCR not performed
15	GSB_J23L_F	Contig2: 99071-99408	CTGCCACCCCAAAAATAAAT
	GSB_J23L_R		TGAATGATCCTTGGTTTCCA	338	absent	338	PCR not performed
16	GSB_J24L_F	Contig31: 121052-121412	GCTTCTCCCAAGCTTCCTTT
	GSB_J24L_R		CTGGGAAAGGCCAGATCATA	361	absent	361	PCR not performed
17	GSB_J26L_F	Contig389: 12174-12665	GCAGAGACTGGGTCTTCCTG
	GSB_J26L_R		TCATTTCTTGGCTTTCACCA	492	absent	two bands: ~300 and ~800	no product
18	GSB_J27L_F	Contig40: 114658-114992	AGGAAAACACAGCCTCAAATG
	GSB_J27L_R		CCATGAAAACCAGCCAACTT	335	absent	335	PCR not performed
19	GSB_J31L_F	Contig54: 69795-70220	CAAGATGCTCAGGACAGCAC
	GSB_J31L_R		TTGGGGTATGTCTGGAAAGC	426	absent	~250	no product
20	GSB_J32L_F	Contig54: 71060-71265	TGTGCAATGTGTTAGCTTATGTT
	GSB_J32L_R		GCCTGCTTTCCAGACATACC	206	absent	206	PCR not performed
21	GSB_J33L_F	Contig5: 76141-76623	ACCGATTGCAAATACCAAGC
	GSB_J33L_R		CCCAGTCACCCTGTGAATTT	483	absent	483	PCR not performed
22	GSB_J34L_F	Contig67: 22306-23138	CACATGCATTCCAATGATCC
	GSB_J34L_R		TGCATTCTTGAACGAGCTCTAA	833	absent	~1000	~1000
23	GSB_J36L_F	Contig69: 145421-146262	CACATGATGCTCTGAGCTAATACTT
	GSB_J36L_R		TTCTCTGGCAATGAGAATAGCA	842	absent	842	PCR not performed
24	GSB_J39L_F	Contig8: 128164-128838	CTTCCTGCTCTTTGCCAGTG
	GSB_J39L_R		TGTGTATCGGATAGGGCTGA	675	absent	675	PCR not performed
25	GSB_J40L_F	Contig8: 187047-187426	TCTTATCAGCCACCTACTCTCC
	GSB_J40L_R		CTTGTGGTCCTCTAGGACAGG	380	absent	380	PCR not performed
26	GSB_J43L_F	Contig9:104060-104418	TCGAGGAAGAGGTGGAAAAC
	GSB_J43L_R		TTTTCCCATTGCATCTCCTG	359	absent	no product	359
27	GSB_PJ20_F	Contig128: 35397-35699	GAAAAACTGGGGCTATGCAA
	GSB_PJ20_R		TTTGGGCACCAGTGTTGTAA	303	absent	303	PCR not performed
28	GSB_PJ44_F	Contig208: 40804-41802	GGCAGAGCTGTCTGCAGTATC
	GSB_PJ44_R		AGAAACCCGTGAAGTGGATG	999	absent	999	PCR not performed
29	GSB_PJ109_F	Contig54: 48707 -48932	AGCCTCAGGTTCTGCAACTC
	GSB_PJ109_R		TCTGACTTCAGGCAAAGCTG	226	absent	226	PCR not performed
30	PB_GSB_J7L_F	Contig100: 33458-34408	ACAGCTGGAAGGCATACACA
	PB_GSB_J7L_R		GCTTCTTGAATTAGCCCTTGT	951	absent	~450	no product
31	PB_GSB_J17L_F	Contig119: 146206-146669	ACAGAATAGAATCTTCTTTGCAATTAT
	PB_GSB_J17L_R		CTGGCTTTAATCATATTGACATCCT	464	absent	no product	464
32	PB_GSB_J19L_F	Contig119: 20752-21149	GCTAAGGAGACGTTGGCTTTT
	PB_GSB_J19L_R		ACCACCTGTTGGTTTGGGTA	398	absent	398	PCR not performed
33	PB_GSB_J95L_F	Contig22: 119175-119850	CCATAAAACTAATGGGTTTACG
	PB_GSB_J95L_R		CCGATCACCTTTGGAATGAT	676	absent	no product	no product
34	PB_GSB_J107L_F	Contig236: 40416-40992	CCTGTACTCTTGGCAGAATGG
	PB_GSB_J107L_R		GTAGGCCTGTCCAAGCAAGT	577	absent	no product	~300
35	PB_GSB_J112L_F	Contig244: 66045-66359	TGTGTCCCATAATGGCTGTG
	PB_GSB_J112L_R		TCAAATGGAATTTCAGGCTGT	315	absent	315	PCR not performed
36	PB_GSB_J144L_F	Contig2: 126143-132249	TTGAGTGGCCATCAGAAGGT
	PB_GSB_J144L_R		AGAGTGTTCGGCCTTAGCAA	674	absent	674	PCR not performed
37	PB_GSB_J149L_F	Contig2: 138324-139028	CTTTGCCCAGAAGAGACCAC
	PB_GSB_J149L_R		CACACGCTGCTTTACTCCAA	705	absent	several bands	no product
38	PB_GSB_J150L_F	Contig2: 759-1098	TGCCATGTTGGTGTTTCTGT
	PB_GSB_J150L_R		CAAAACGATGCTGACCTTGA	340	absent	340	PCR not performed
39	PB_GSB_J177L_F	Contig396: 7274-7757	GCCCTGTGTAACACGGAAGT
	PB_GSB_J177L_R		TTTTCCGTGGGTAAATTCCT	484	absent	no product	no product
40	PB_GSB_J210L_F	Contig5: 203898-204294	ACTCCAGCCAACACTTGGAG
	PB_GSB_J210L_R		CCGCCTCACCATTAAAACAT	397	absent	no product	no product
41	PB_GSB_J255L_F	Contig8: 215183 -215681	GCACTTTTTGGGGGAATTTT
	PB_GSB_J255L_R		TATGGCGACTGTTTGCCTTT	499	absent	no product	no product
42	PB_GSB_J267L_F	Contig92: 126886-127474	GGAGAATGGAGAAGCCACAT
	PB_GSB_J267L_R		GCAGCTGTGAGCACCTGTT	589	absent	589	PCR not performed

## Sheet: S9
Table S9. Protein-coding transcripts identified using RNAseq reads generated from gorilla testis sample and fraction of the sequence covered by different short read libraries.
We verified that the recontructed transcripts had coding potential using Transdecoder (Haas et al. 2013). However, some of them were short compared to full-length transcripts and their coding potential was affected.
Because of the nature of the stranded RNAseq protocol, we reconstructed transcripts expressed from both strands. Some transcripts require additional validation.
We mapped the reads from four types of libraries (RNAseq, Y flow-sorted, male genomic, and female genomic) to the transcripts to verify coverage and Y chromosome specificity.
				Short read libraries
Gene/Transcript	Classification	Length of the transcript without Ns	Coding potential with Transdecoder	RNAseq	Male flow sorted	Male genomic	Female genomic
AMELY	X-degenerate	575	yes	0.965157	1	0.904181	0.891986
BPY2	Ampliconic	160	no	1	1	0.842767	0.628931
CDY1	Ampliconic	1985	yes	0.996472	1	1	0.153226
CYorf15A	X-degenerate	1860	yes	1	1	0.272189	0.366326
TXLNGY*	X-degenerate	1349	yes	0.997775	0.987389	0.737389	0.329377
TXLNGY*	X-degenerate	417	no	1	0.927885	0.980769	0.372596
DAZ1	Ampliconic	663	no	1	1	0.564955	1.00**
DDX3Y	X-degenerate	3332	yes	1	1	0.655359	0.88622
EIF1AY	X-degenerate	1318	yes	0.987851	1	0.568717	0.340167
HSFY1	Ampliconic	1406	yes	1	1	0.990747	0.58363
KDM5D	X-degenerate	4370	yes	1	0.996796	0.237583	0.362783
NLGN4Y	X-degenerate	150	no	1	1	1	0.966443
PRKY*	X-degenerate	288	no	1	1	0.989547	1.00**
PRKY*	X-degenerate	315	no	0.990446	0.949045	0.0764331	0.595541
PRY	Ampliconic	171	no	0.988235	1	1	0
RBMY1/2/3	Ampliconic	1934	yes	1	1	1	0.280393
RPS4Y1	X-degenerate	748	yes	1	1	0.834016	0.981557
RPS4Y2	X-degenerate	1884	no	1	1	0.390866	0.197557
SRY	X-degenerate	589	yes	0.998299	0.97449	0.455782	0
TBL1Y	X-degenerate	456	no	1	1	0.19603	0.416874
TMSB4Y	X-degenerate	740	no	1	1	0.948579	0.522327
TSPY1	Ampliconic	1286	yes	1	1	0.912062	0.077821
USP9Y*	X-degenerate	2590	yes	0.997296	1	0.308613	0.366937
USP9Y*	X-degenerate	840	yes	0.996424	1	0.599523	0.762813
UTY	X-degenerate	2532	yes	0.99921	1	0.701699	0.562228
XKRY	Ampliconic	258	no	1	1	0.996109	0.105058
ZFY*	X-degenerate	3216	yes	0.991322	0.998554	0.345965	0.674573
ZFY*	X-degenerate	1795	yes	0.992196	1	0.601449	0.212375
*Genes with two transcripts
**Genes with autosomal or X-chromosomal reads mapping

## Sheet: S10
Table S10. Pseudogenes and noncoding sequences from Cortez et al. 2014 and reconstructed in this study, as found in the best assembly. The naming follows the one reported in Cortez et al. 2014, except the ones obtained by us that are named after the scaffold generated by SSPACE. Some pseudogenes are collapsed in the best assembly therefore the same contigs/scaffolds encompass different pseudogene…
Pseudogene or noncoding	Total size (nt)	Scaffold in best assembly	Size recovered (nt)	Fraction of the pseudogene/ noncoding sequence recovered
EIF1AYpseudogene_Cortez	205	367	205	1
HSFYpseudogene1_Cortez	381	143	381	1
HSFYpseudogene2_Cortez	221	143	221	1
pseudogene_AC006987_4_Cortez	527	101	517	0.98
pseudogene_AC007241_3_Cortez	392	92	392	1
pseudogene_AC007274_2_Cortez	650	750,21,29,63,3,17	394	0.61
pseudogene_AC007274_5_Cortez	605	14,485,25,21	276	0.46
pseudogene_AC007322_1_Cortez	576	279485	576	1
pseudogene_AC007322_3_Cortez	719	63	719	1
pseudogene_AC007322_7_Cortez	700	21	700	1
pseudogene_AC007742_3_Cortez	327	166	327	1
pseudogene_AC007742_7_Cortez	1536	166	1489	0.97
pseudogene_AC007967_3_Cortez	1159	142,25	1064	0.92
pseudogene_AC007967_4_Cortez	558	485,63,29,248	380	0.68
pseudogene_AC009494_3_Cortez	455	66	455	1
pseudogene_AC009947_2_Cortez	699	21,25,167,485	699	1
pseudogene_AC009947_5_Cortez	672	21	672	1
pseudogene_AC010086_1_Cortez	1051	54,25,71	830	0.79
pseudogene_AC010086_4_Cortez	873	17,25	798	0.91
pseudogene_AC010086_5_Cortez	226	17	226	1
pseudogene_AC010141_4_Cortez	713	63	713	1
pseudogene_AC010141_8_Cortez	595	279485	595	1
pseudogene_AC010154_2_Cortez	249	17,145,14	244	0.98
pseudogene_AC016694_2_Cortez	679	21,248,25	644	0.95
pseudogene_AC024183_3_Cortez	1536	166	1489	0.97
pseudogene_ACTG1P11_Cortez	1113	166	1077	0.97
pseudogene_AKRD36P1_Cortez	576	296	177	0.31
pseudogene_AP1L1P2_Cortez	1036	22	1036	1
pseudogene_ARSDP1_Cortez	1106	291,30	914	0.83
pseudogene_ARSEP1_Cortez	488	2	433	0.89
pseudogene_ARSFP1_Cortez	474	147,90	474	1
pseudogene_ASS1P6_Cortez	983	262	807	0.82
pseudogene_ATP5JP1_Cortez	322	7	322	1
pseudogene_BCORP1_Cortez	2954	5,236,69	2696	0.91
pseudogene_BPY2DP_Cortez	245	65,9	92	0.38
pseudogene_CASKP1_Cortez	487	224	487	1
pseudogene_CDY10P_Cortez	1434	167	1434	1
pseudogene_CDY11P_Cortez	1587	16	1587	1
pseudogene_CDY12P_Cortez	922	119	922	1
pseudogene_CDY13P_Cortez	922	119	922	1
pseudogene_CDY14P_Cortez	926	119	926	1
pseudogene_CDY15P_Cortez	1533	178	1533	1
pseudogene_CDY18P_Cortez	1456	203	1456	1
pseudogene_CDY19P_Cortez	1469	203	1393	0.95
pseudogene_CDY22P_Cortez	1517	178	1517	1
pseudogene_CDY23P_Cortez	926	119	926	1
pseudogene_CDY3P_Cortez	1593	16	1064	0.67
pseudogene_CDY4P_Cortez	1416	72	1082	0.76
pseudogene_CDY5P_Cortez	1532	166	1532	1
pseudogene_CDY7P_Cortez	1461	203	1461	1
pseudogene_CDY8P_Cortez	1265	55	1265	1
pseudogene_CDY9P_Cortez	1532	166	1532	1
pseudogene_DPPA2P1_Cortez	447	571	447	1
pseudogene_EEF1A1P41_Cortez	203	480	203	1
pseudogene_GAPDHP17_Cortez	983	75	966	0.98
pseudogene_GAPDHP19_Cortez	878	81	878	1
pseudogene_GOT2P5_Cortez	533	85	527	0.99
pseudogene_GPM6BP1_Cortez	144	143	131	0.91
pseudogene_GPR143P_Cortez	205	208	205	1
pseudogene_HSFY3P_Cortez	1105	76	1105	1
pseudogene_HSFY4P_Cortez	1170	61152	1170	1
pseudogene_HSFY6P_Cortez	403	119	293	0.73
pseudogene_KIAA0664P1_Cortez	1153	92	1153	1
pseudogene_KIAA0664P2_Cortez	1231	92	1197	0.97
pseudogene_KRYP1_Cortez	492	1	492	1
pseudogene_KRYP3_Cortez	1097	27	1097	1
pseudogene_KRYP4_Cortez	480	199	438	0.91
pseudogene_KRYP6_Cortez	1097	27	1097	1
pseudogene_MED14P1_Cortez	635	375,67	608	0.96
pseudogene_MRA5P1_Cortez	6496	171592	1017	0.16
pseudogene_MTCYBP2_Cortez	171	44	171	1
pseudogene_OFD1P10Y_Cortez	1348	100	1222	0.91
pseudogene_OFD1P11Y_Cortez	1115	166,0,41,7	1097	0.98
pseudogene_OFD1P12Y_Cortez	1114	0,7	1114	1
pseudogene_OFD1P13Y_Cortez	1174	0,7	1174	1
pseudogene_OFD1P15Y_Cortez	1336	100,0,119	1326	0.99
pseudogene_OFD1P18Y_Cortez	955	0,166,41,7	800	0.84
pseudogene_OFD1P1Y_Cortez	1192	166,7	1192	1
pseudogene_OFD1P2Y_Cortez	1118	166,7	1118	1
pseudogene_OFD1P3Y_Cortez	770	41141	764	0.99
pseudogene_OFD1P4Y_Cortez	1062	0,41	1062	1
pseudogene_OFD1P5Y_Cortez	2582	62,45,143	2582	1
pseudogene_OFD1P6Y_Cortez	2662	1,62,45	2602	0.98
pseudogene_OFD1P7Y_Cortez	1053	0,41,7	1053	1
pseudogene_OFD1P8Y_Cortez	1376	100,1,119	1366	0.99
pseudogene_OFD1P9Y_Cortez	1434	100,1,119	1422	0.99
pseudogene_PRYP2_Cortez	491	166	349	0.71
pseudogene_PRYP5_Cortez	266	119	59	0.22
pseudogene_PRYP6_Cortez	317	119	123	0.39
pseudogene_RAB9AP1_Cortez	573	68166	552	0.96
pseudogene_RAB9AP2_Cortez	597	115	597	1
pseudogene_RAB9AP4_Cortez	607	62	607	1
pseudogene_RBMY1KP_Cortez	476	56	476	1
pseudogene_RBMY2AP_Cortez	1157	21	1157	1
pseudogene_RBMY2HP_Cortez	712	63,17,25	386	0.54
pseudogene_RBMY2JP_Cortez	1047	54,142,71,25	888	0.85
pseudogene_RBMY2KP_Cortez	930	17,142,25	403	0.43
pseudogene_RBMY2OP_Cortez	810	25	699	0.86
pseudogene_RBMY2TP_Cortez	933	17	802	0.86
pseudogene_RBMY2UP_Cortez	324	71	324	1
pseudogene_RBMY2YP_Cortez	911	54	911	1
pseudogene_RBMY3AP_Cortez	1129	21,17,145,25	692	0.61
pseudogene_RPS24P1_Cortez	351	90	351	1
pseudogene_SFPQP1_Cortez	1514	280	1495	0.99
pseudogene_TAB3P1_Cortez	1553	174	1394	0.9
pseudogene_TAF9P1_Cortez	515	92	515	1
pseudogene_TBL1YP1_Cortez	998	251,714,223,44	969	0.97
pseudogene_TCEB1P10_Cortez	327	309	327	1
pseudogene_TCEB1P14_Cortez	331	795	59	0.18
pseudogene_TCEB1P15_Cortez	332	119	332	1
pseudogene_TCEB1P17_Cortez	324	41	324	1
pseudogene_TCEB1P4_Cortez	333	167	333	1
pseudogene_TLG2P_Cortez	6276	341	6178	0.98
pseudogene_TOMM22P1_Cortez	312	213	312	1
pseudogene_TOMM22P2_Cortez	237	76	237	1
pseudogene_TRAPPC2P10_Cortez	304	436	304	1
pseudogene_TRAPPC2P7_Cortez	213	62	213	1
pseudogene_TRAPPC2P8_Cortez	395	166	395	1
pseudogene_TRIM60P10Y_Cortez	737	9	735	1
pseudogene_TRIM60P3Y_Cortez	637	99992	388	0.61
pseudogene_TRIM60P5Y_Cortez	574	99	574	1
pseudogene_TRIM60P8Y_Cortez	747	9	745	1
pseudogene_TRIM60P9Y_Cortez	811	5	811	1
pseudogene_TSPY12P_Cortez	848	14	628	0.74
pseudogene_TSPY14P_Cortez	891	17	891	1
pseudogene_TSPY18P_Cortez	500	71,14	388	0.78
pseudogene_TSPY22P_Cortez	600	29	600	1
pseudogene_TSPY24P_Cortez	431	17,21,71	312	0.72
pseudogene_TSPY25P_Cortez	726	21,63	314	0.43
pseudogene_TSPY5P_Cortez	861	14	560	0.65
pseudogene_TTTY25P_Cortez	1427	71	1427	1
pseudogene_TUBB1P1_Cortez	1247	434,82	531	0.43
pseudogene_TUBB1P2_Cortez	1300	434,82	559	0.43
pseudogene_USP9YP1_Cortez	980	159143	892	0.91
pseudogene_USP9YP11_Cortez	713	463214200	713	1
pseudogene_USP9YP12_Cortez	565	482265	538	0.95
pseudogene_USP9YP13_Cortez	446	199228	446	1
pseudogene_USP9YP14_Cortez	543	763,1	543	1
pseudogene_USP9YP15_Cortez	397	166,68	369	0.93
pseudogene_USP9YP19_Cortez	452	199228201	395	0.87
pseudogene_USP9YP2_Cortez	978	159143	890	0.91
pseudogene_USP9YP20_Cortez	483	68	483	1
pseudogene_USP9YP23_Cortez	407	166,68,201	372	0.91
pseudogene_USP9YP24_Cortez	696	119	696	1
pseudogene_USP9YP25_Cortez	441	68	391	0.89
pseudogene_USP9YP27_Cortez	423	166,68	394	0.93
pseudogene_USP9YP28_Cortez	582	763,1	573	0.98
pseudogene_USP9YP29_Cortez	538	68	538	1
pseudogene_USP9YP3_Cortez	1634	167,16	1634	1
pseudogene_USP9YP30_Cortez	451	265	435	0.96
pseudogene_USP9YP31_Cortez	879	124	879	1
pseudogene_USP9YP32_Cortez	440	357	440	1
pseudogene_USP9YP36_Cortez	829	124	729	0.88
pseudogene_USP9YP4_Cortez	1742	167,536,16	1710	0.98
pseudogene_USP9YP5_Cortez	629	1	629	1
pseudogene_USP9YP6_Cortez	851	124	851	1
pseudogene_USP9YP8_Cortez	500	345,16	500	1
pseudogene_ZF736P11Y_Cortez	1062	99	848	0.8
pseudogene_ZF736P12Y_Cortez	1108	99	777	0.7
pseudogene_ZF736P1Y_Cortez	1226	12	730	0.6
pseudogene_ZF736P2Y_Cortez	1256	9,12	457	0.36
pseudogene_ZF736P3Y_Cortez	1436	12	549	0.38
pseudogene_ZF736P4Y_Cortez	1174	99	551	0.47
pseudogene_ZF839P1_Cortez	812	67	812	1
pseudogene_ZF886P_Cortez	675	354	648	0.96
TSPYpseudogene_Cortez	2125	17	2109	0.99
Noncoding_0	433	85	433	1
Noncoding_0_Cortez	707	85	703	0.99
Noncoding_1_Cortez	1812	76	1736	0.96
Noncoding_1	1305	174	1305	1
Noncoding_2_Cortez	1640	17,76	1589	0.97
Noncoding_3	369	174	369	1
Noncoding_3_Cortez	478	174	478	1
Noncoding_4	1486	174	1486	1
Noncoding_4_Cortez	1471	174	1471	1
Noncoding_5_Cortez	285	174	283	0.99
Noncoding_6	442	174	442	1
Noncoding_6_Cortez	665	174	665	1
Noncoding_7	1047	76	1047	1
Noncoding_7_Cortez	577	76	558	0.97
Noncoding_8	562	120	542	0.96
Noncoding_8_Cortez	1143	120	1143	1
Noncoding_9_Cortez	1007	189	1007	1
Noncoding_9	1367	189	1367	1
Noncoding_20	1638	24	274	0.17
Noncoding_20_Cortez	2219	24	2219	1
Noncoding_21_Cortez	270	9	270	1
Noncoding_22_Cortez	295	9	295	1
Noncoding_23_Cortez	202	63	200	0.99
Noncoding_24_Cortez	266	24	266	1
Noncoding_25	387	174	387	1
Noncoding_25_Cortez	216	174	216	1
scaffold38206|size300	300	41	300	1
scaffold36669|size305	305	71	289	0.95
scaffold36263|size306	306	174	306	1
scaffold35531|size308	308	123	212	0.69
scaffold35092|size310	310	21	310	1
scaffold34433|size312	312	3	285	0.91
scaffold34203|size313	313	365	313	1
scaffold33314|size316	316	24	207	0.66
scaffold33018|size317	317	159	317	1
scaffold32560|size318	318	224	318	1
scaffold31640|size322	322	24	317	0.98
scaffold31100|size324	324	76	322	0.99
scaffold30523|size326	326	76	326	1
scaffold30312|size327	327	208	327	1
scaffold29974|size328	328	100	310	0.95
scaffold29047|size332	332	25	282	0.85
scaffold28625|size334	334	24	249	0.75
scaffold26592|size344	344	571	330	0.96
scaffold24888|size352	352	17	69	0.2
scaffold24641|size354	354	24	348	0.98
scaffold23505|size360	360	44	353	0.98
scaffold22443|size366	366	279	286	0.78
scaffold21655|size371	371	29	371	1
scaffold21066|size375	375	14	375	1
scaffold20739|size377	377	367	377	1
scaffold19972|size382	382	76	382	1
scaffold19295|size387	387	21	363	0.94
scaffold19214|size388	388	72	388	1
scaffold19005|size389	389	363	388	1
scaffold18399|size394	394	507	394	1
scaffold18106|size397	397	341	397	1
scaffold17157|size405	405	145	405	1
scaffold15325|size423	423	507	411	0.97
scaffold14772|size429	429	76	429	1
scaffold14444|size433	433	25,17	257	0.59
scaffold13673|size442	442	11	429	0.97
scaffold12119|size463	463	14	463	1
scaffold11254|size477	477	498	477	1
scaffold10309|size493	493	485	404	0.82
scaffold9958|size500	500	571	488	0.98
scaffold8286|size538	538	76	538	1
scaffold7969|size547	547	76	547	1
scaffold6373|size599	599	11	599	1
scaffold2716|size854	854	352	805	0.94
scaffold2185|size1146	1146	341	1098	0.96
scaffold951|size1310	1310	507	1310	1

[truncated: 10 more sheets: S11, S12, S13, S14, S15, S16, S17, S18, S19, S20]
